# Supplementary material
Source: PubMed Central journal article supplement (PMC7399010)

Additional file 6

a)

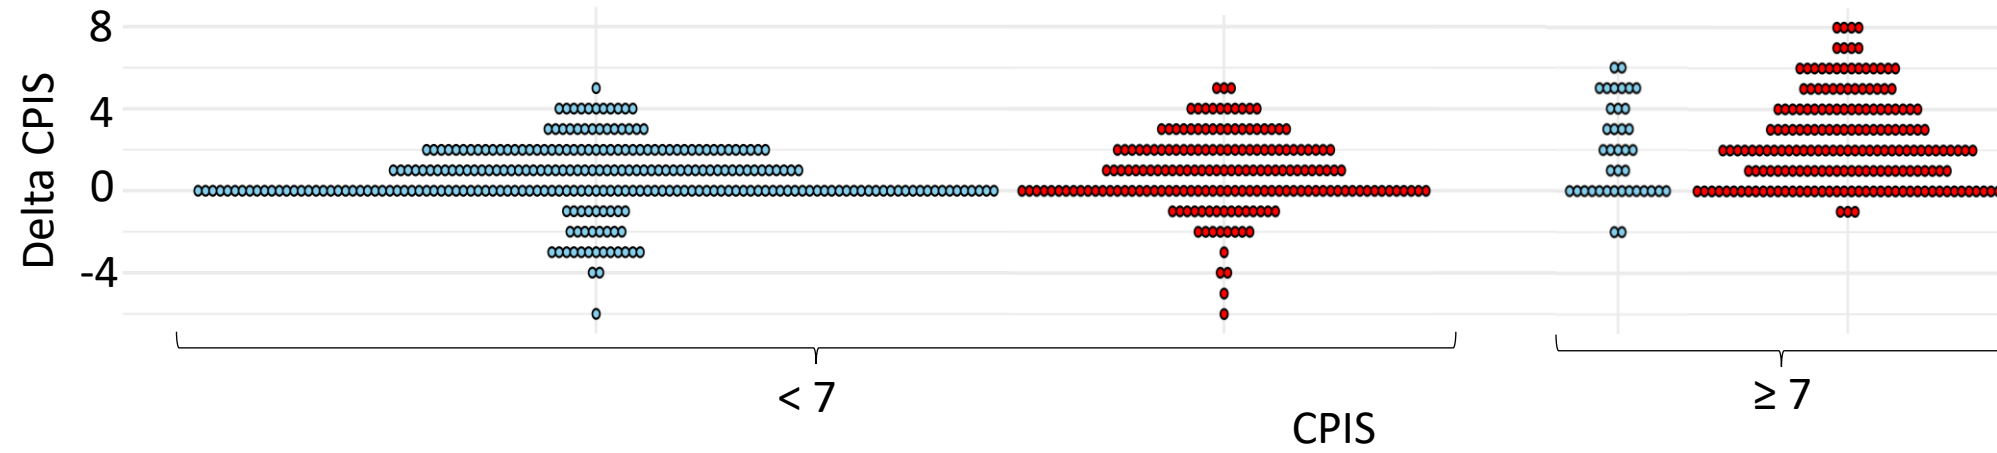

b)

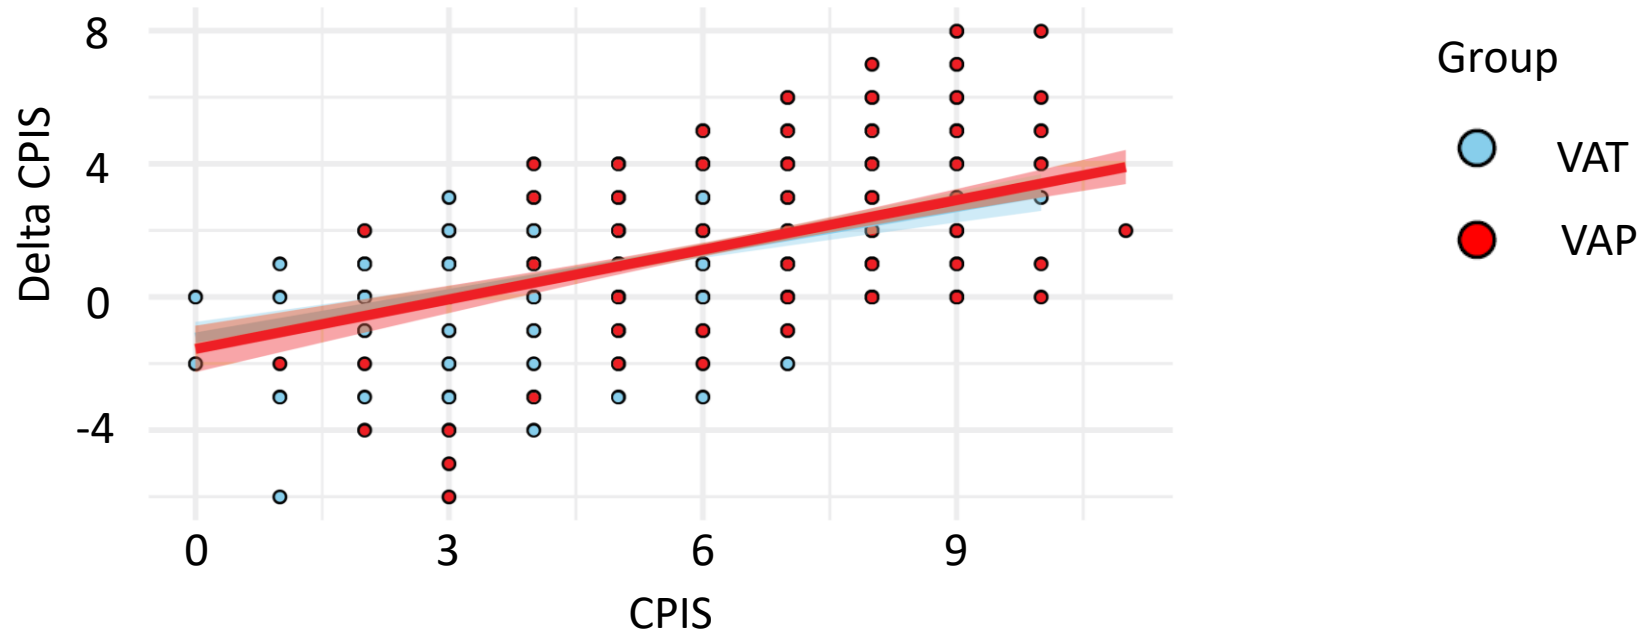

Supplement: 13613_2020_721_MOESM6_ESM.pdf [file 13613_2020_721_MOESM6_ESM.pdf]
